# Supplementary material for: Mechanosensory neurons control sweet sensing in Drosophila
Source: PubMed Central journal article supplement (PMC5031804; doi:10.1038/ncomms12872), 2016-09-19
Supplement: ncomms12872-s1.pdf [file ncomms12872-s1.pdf]

## Supplementary Figure 1

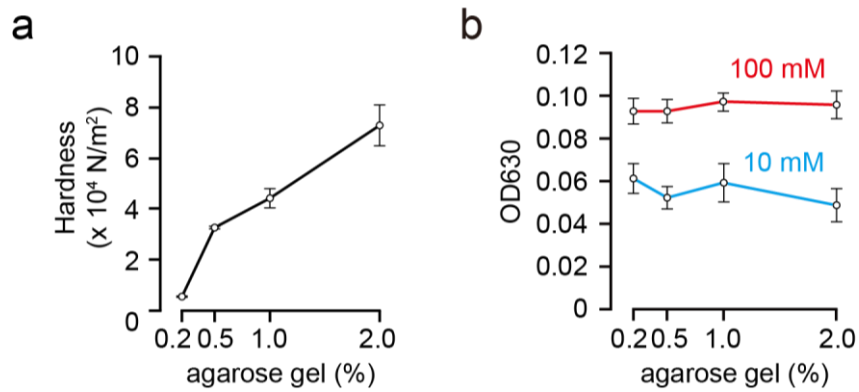

**Supplementary Figure 1. Food hardness and food palatability.** (a) Food hardness depending on agarose concentration. n=6. (b) Mean food intake of 10 mM and 100 mM sucrose-containing food depending on its hardness. n=6. All data are presented as means  $\pm$  S.E.M. The ANOVA was used to determine statistical significance.

## Supplementary Figure 2

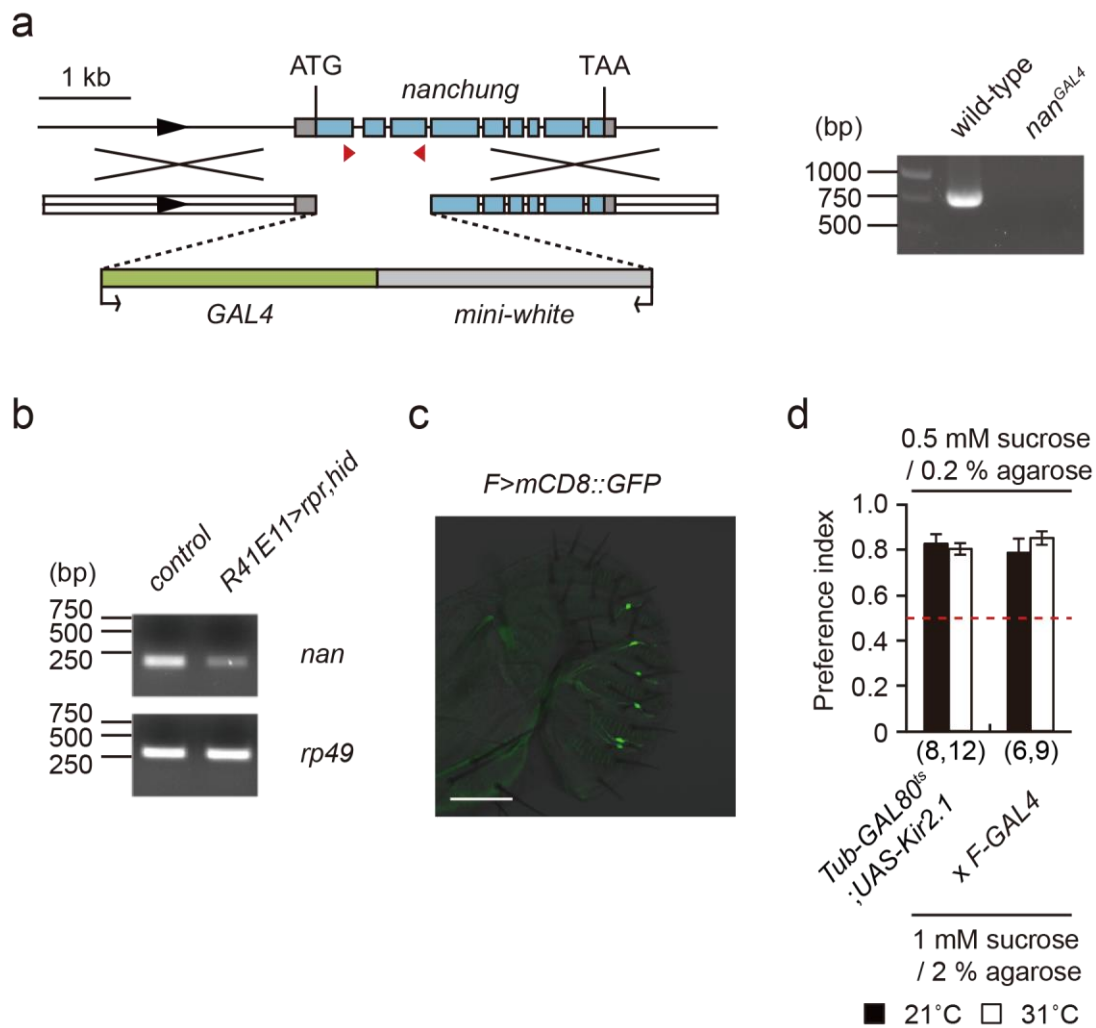

**Supplementary Figure 2. Generation of the *nan<sup>GAL4</sup>* allele and labellar mechanosensory neuron *nan* expression.** (a) Structure of the *nan* locus and homologous recombination targeting scheme used to generate the *nan<sup>GAL4</sup>* allele (left). Blue boxes indicate exons. Red triangles indicate the primers used for genomic DNA PCR. Deletion of *nan* confirmed by genomic DNA PCR (right). (b) Expression of *nan* in the labellum as measured by RT-PCR on labella from control and mechanosensory neuron-ablated flies. *rp49* was used as an internal control. (c) Confocal images of labella expressing mCD8::GFP driven by *F-GAL4*. Labella were stained with a rabbit anti-GFP. GFP fluorescence was superimposed on a transmitted light image. Scale bar represents 50  $\mu$ m. (d) Food preference of *F-GAL4* neuron-inactivated

flies. Flies were given a choice between 0.5 mM sucrose in 0.2% agarose and 1 mM sucrose in 2 % agarose. Flies were raised at 21°C and shifted to the indicated temperature for 3 days before assaying. n is indicated in parentheses. The unpaired *t*-test was used to determine statistical significance. All data are presented as means  $\pm$  S.E.M.

### Supplementary Figure 3

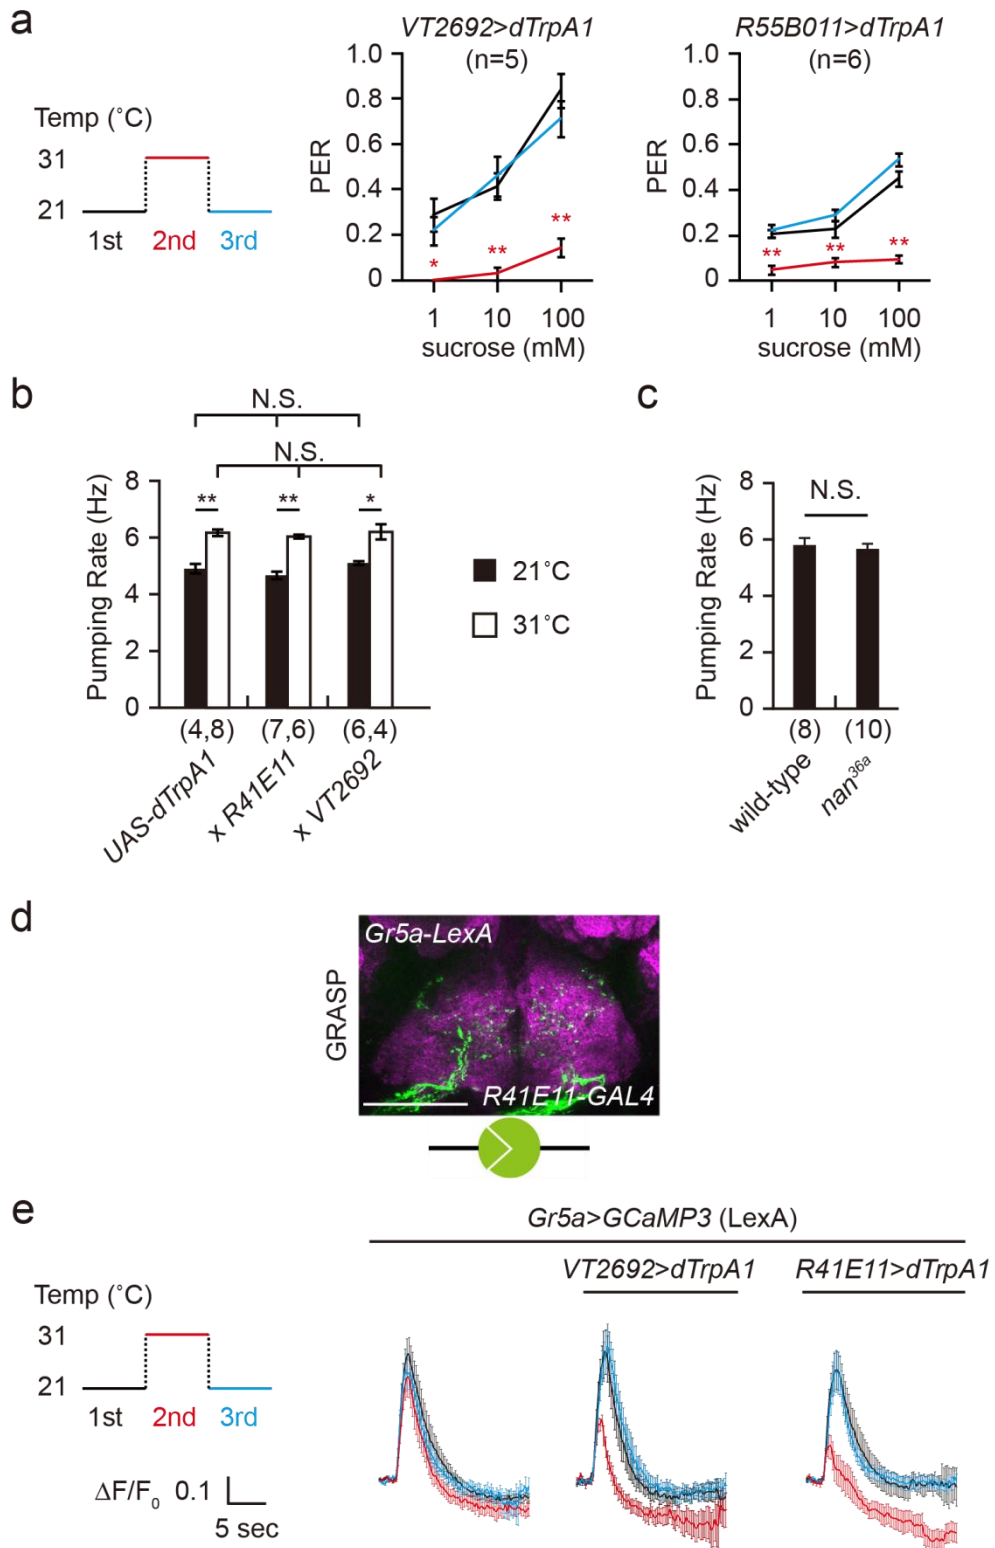

**Supplementary Figure 3. Functional interaction between mechanosensory neurons and sweet GRNs in the SEZ.** (a) Proboscis extension response (PER) upon activation of mechanosensory neurons. The PER assay was performed at the indicated temperatures. ANOVAs with Tukey *post-hoc* tests. \* $P < 0.05$ , \*\* $P < 0.01$ . (b,c) Effects of mechanosensory neurons and Nan on pharyngeal pumping. (b) Pumping frequencies upon activation of mechanosensory neurons. Black and white bars indicate the pumping frequencies (Hz) of the indicated genotypes at 21°C and 31°C, respectively. The unpaired *t*-test was used to determine the statistical significance of changes in frequency related to temperature. \* $P < 0.05$ , \*\* $P < 0.01$ . The ANOVA revealed no significant changes with respect to genotype. N.S. means no significance. (c) Pumping frequencies of *wild-type* and *nan*<sup>36a</sup>. The unpaired *t*-test was used to determine statistical significance. (d) Structural proximity of mechanosensory neurons and sweet GRNs in the subesophageal zone (SEZ). GRASP images in the SEZ (above) and GRASP schematics (below). GRASP between mechanosensory neurons labeled with *R41E11-GAL4* and sweet GRNs labeled with *Gr5a-LexA*. The genotype of the GRASP flies was *Gr5a-LexA/+;LexAOp-CD4::spGFP<sub>11</sub>/+;UAS-CD4::spGFP<sub>1-10</sub>/R41E11-GAL4. nc82* neuropil staining (magenta). Scale bar represents 50 μm. (e) Mechanosensory neurons inhibit calcium responses in the axon termini of sweet GRNs. Time course of calcium responses in the axon termini of sweet GRNs in the SEZ shown as average  $\Delta F/F_0$  traces  $\pm$  S.E.M. The 1<sup>st</sup> and 3<sup>rd</sup> trials were conducted at 21°C and 2<sup>nd</sup> trial was conducted at 31°C to activate mechanosensory neurons via dTrpA1. All data are presented as means  $\pm$  S.E.M.

# Supplementary Figure 4

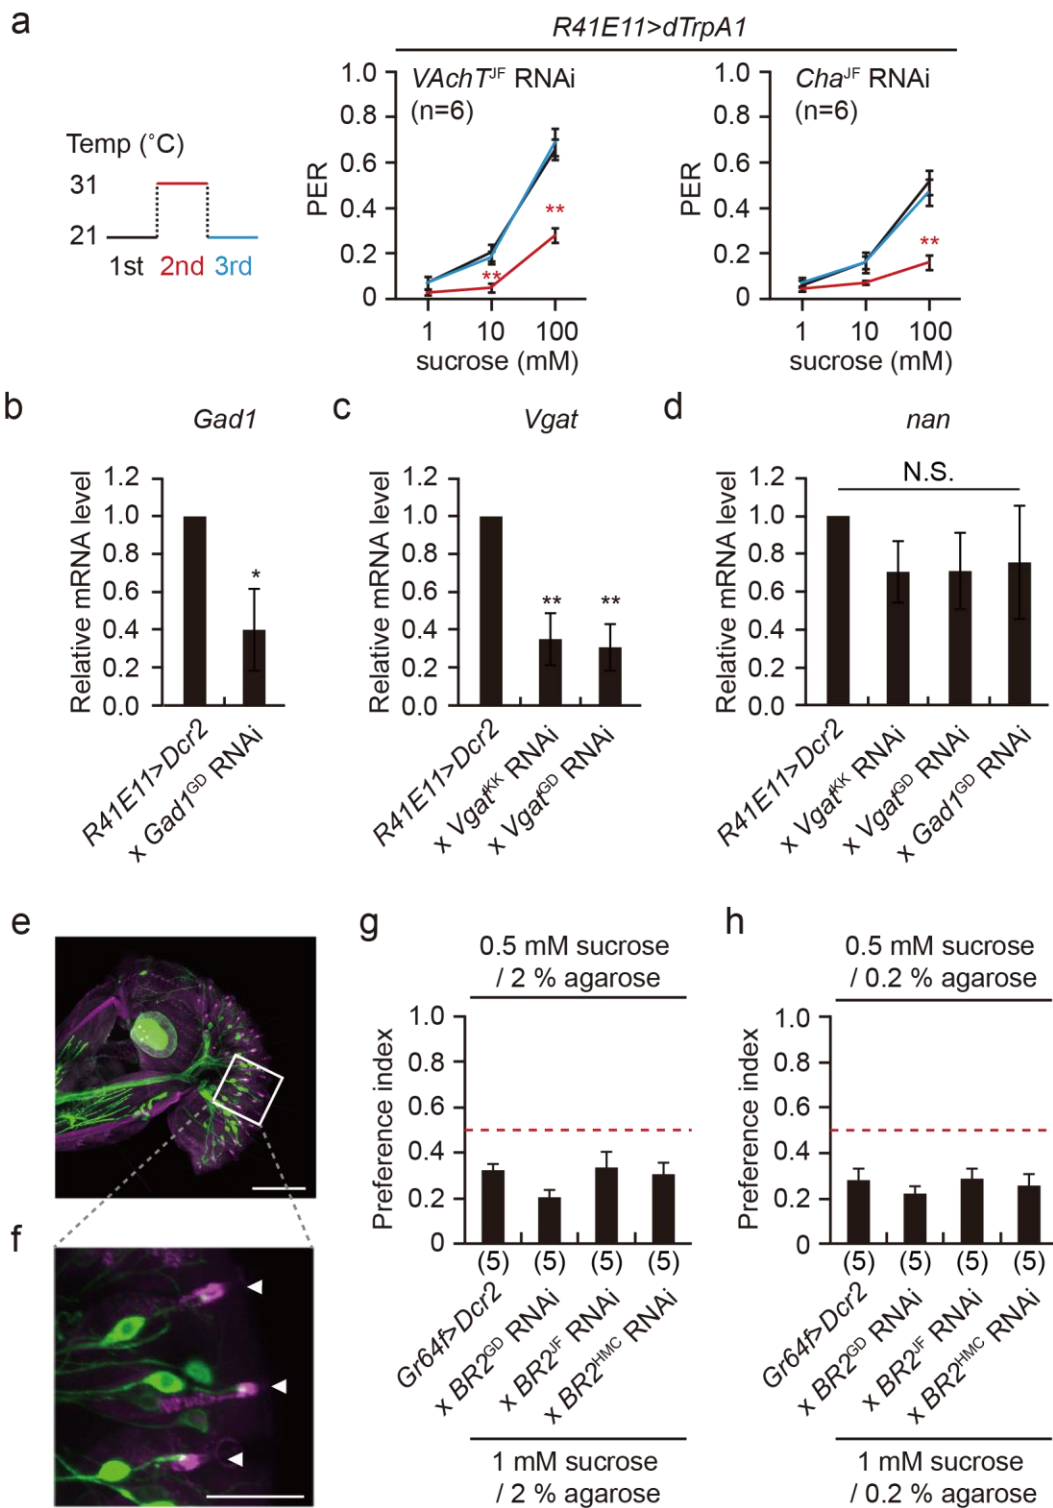

**Supplementary Figure 4. Labellar mechanosensory neurons are GABAergic.** (a) PER of flies upon knockdown of cholinergic components in mechanosensory neurons. The PER assay was conducted at the indicated temperatures. n=6. ANOVAs with Tukey *post-hoc* tests. (b-d) Knockdown efficiency and specificity of *Gad1* and *Vgat* RNAi in labellar mechanosensory neurons. Relative expression of *Gad1* (b), *Vgat* (c), and *nan* (d) transcripts upon knockdown of *Gad1* and *Vgat*. Each C<sub>T</sub> value is normalized to the C<sub>T</sub> value for the *rp49* internal control. n=3 biological replicates with technical duplicates. Unpaired Student's *t*-tests (b) or ANOVAs with Tukey *post-hoc* tests (c,d). (e,f) Representative confocal images of *Vgat-GAL4*>mCD8::GFP labella double-stained with a mouse GFP antibody (green) and a rabbit NOMPA antibody (magenta) to visualize the sensillar base. (f) High magnification view of the white boxed area in (e). White arrowheads indicate sensilla base marked with NOMPA antibody. Scale bar represents 50 μm. (g,h) Food preference between 0.5 mM and 1 mM sucrose either in (g) 2% agarose or (h) 0.2% agarose. The red dashed line at 0.5 represents no preference for either of the two food sources. n=5. ANOVA., and All the data are presented as means ± S.E.M. \**P* < 0.05, \*\**P* < 0.01, and N.S. indicates not statistical significance.

## Supplementary Table 1

|                         | Number of mechanosensory neurons | Number of GFP positive neurons |                     |                      |
|-------------------------|----------------------------------|--------------------------------|---------------------|----------------------|
|                         |                                  | <i>R41E11</i> (n=13)           | <i>VT2692</i> (n=8) | <i>R55B01</i> (n=14) |
| labellum                | 63                               | 58.85±1.02                     | 60.86±1.14          | 26.07±3.10           |
| taste bristle           | 31                               | 27.62±1.03                     | 29.13±1.29          | 22.21±2.47           |
| lateral mechanosensilla | 2                                | 2±0.00                         | 2±0.00              | 2±0.00               |
| taste peg               | 30                               | 29.23±0.97                     | 29.75±1.01          | 1.86±0.70            |

**Supplementary Table 1. Cells labeled by various mechanosensory *GAL4* drivers** Average GFP positive neurons labeled by each mechanosensory neuron driver per half of the labellum. *UAS-mCD8::GFP* was used as a reporter. Total mechanosensory cells per taste bristle, labellar mechanosensillum, and taste peg are also indicated. Data are means ± S.E.M.
